# Supplementary material for: Whole genome sequencing of a snailfish from the Yap Trench (~7,000 m) clarifies the molecular mechanisms underlying adaptation to the deep sea
Source: PubMed Central journal article supplement (PMC8118300; doi:10.1371/journal.pgen.1009530), 2021-05-13
Supplement: pgen.1009530.s002.pdf [file pgen.1009530.s002.pdf]

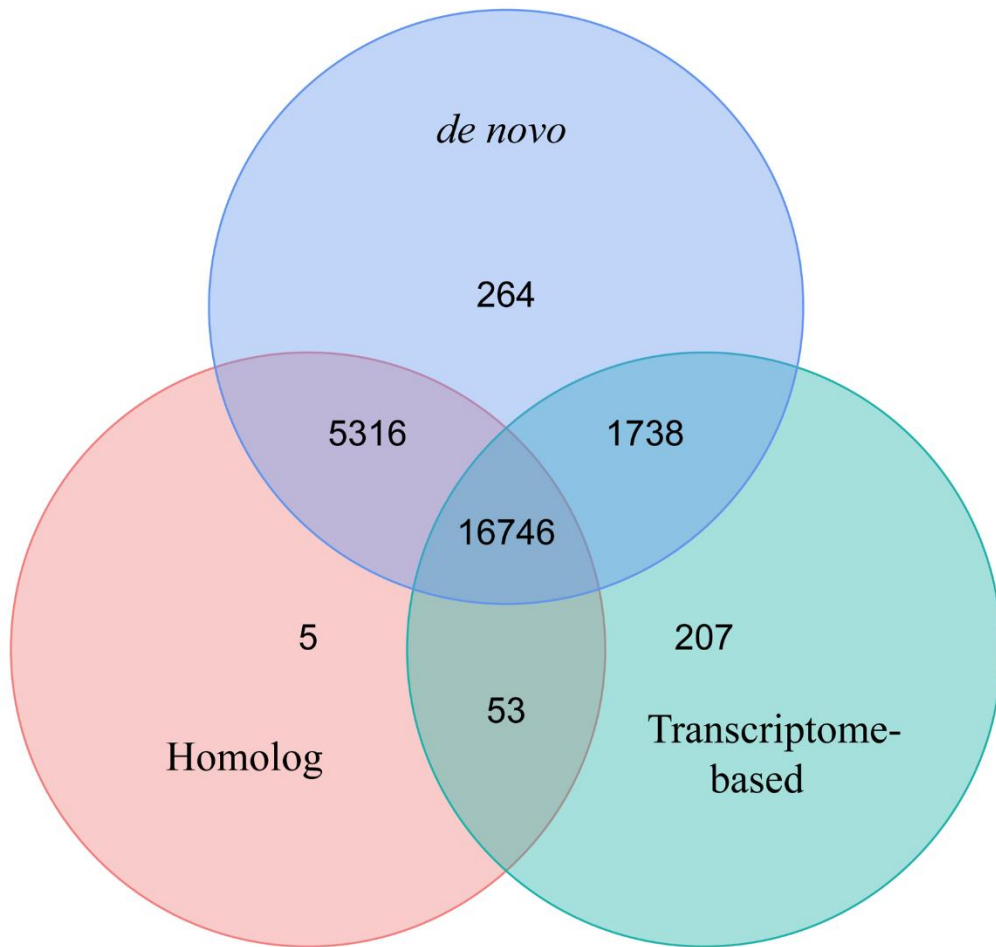

**S2 Fig. Comparison of the gene sets obtained using three prediction methods.** Genes in the Yap hadal snailfish genome were predicted using a combination of three approaches: *de novo*, homolog-based, and transcriptome-based methods. More than 98% of the 23,853 predicted genes were supported by at least two methods.
