# Supplementary material for: Whole genome sequencing of a snailfish from the Yap Trench (~7,000 m) clarifies the molecular mechanisms underlying adaptation to the deep sea
Source: PubMed Central journal article supplement (PMC8118300; doi:10.1371/journal.pgen.1009530), 2021-05-13
Supplement: pgen.1009530.s003.pdf [file pgen.1009530.s003.pdf]

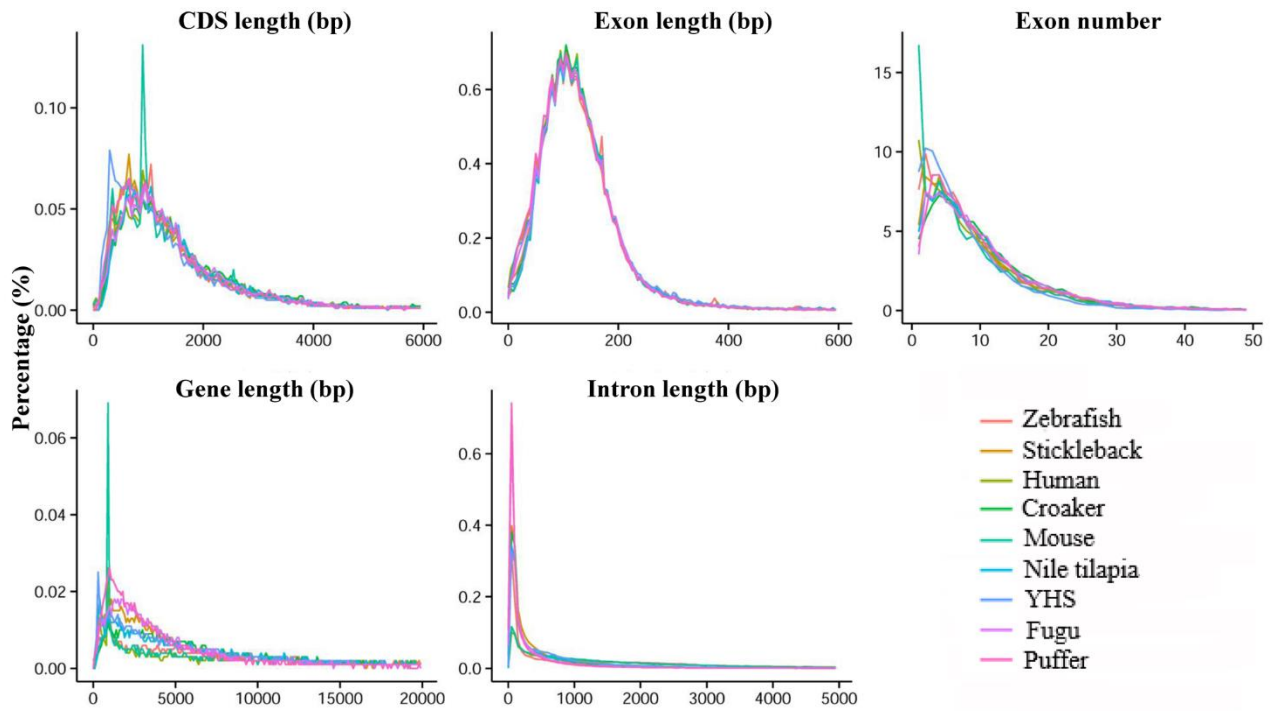

**S3 Fig. Comparison of gene structure characteristics among Yap hadal snailfish (YHS) and other vertebrates. The lines with different colors represent different species.**
