# Supplementary material for: Whole genome sequencing of a snailfish from the Yap Trench (~7,000 m) clarifies the molecular mechanisms underlying adaptation to the deep sea
Source: PubMed Central journal article supplement (PMC8118300; doi:10.1371/journal.pgen.1009530), 2021-05-13
Supplement: pgen.1009530.s004.pdf [file pgen.1009530.s004.pdf]

## BUSCO Assessment Results

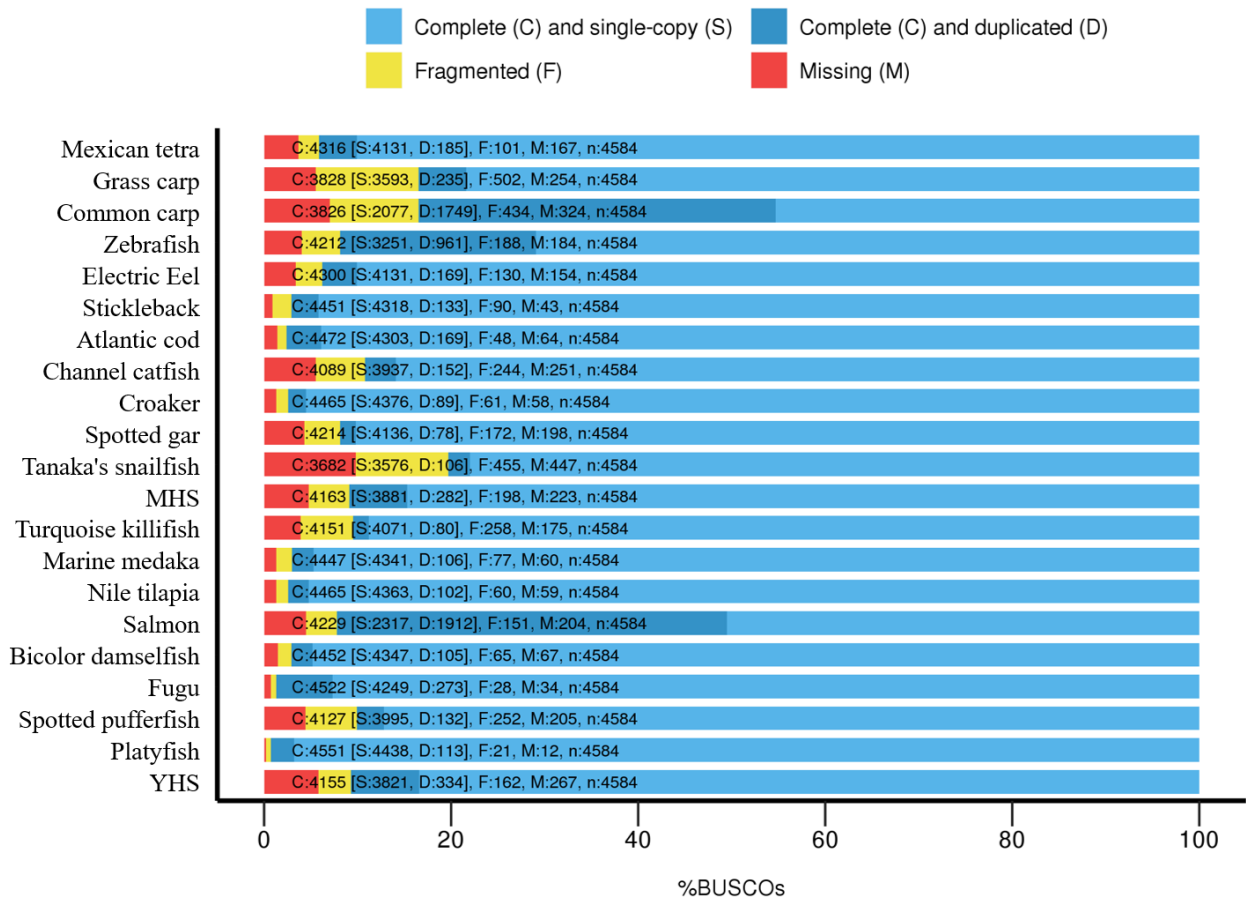

**S4 Fig. BUSCO completeness assessment of 21 teleost species.** The genome completeness of 21 teleost species was estimated using BUSCO v3.03 against the Actinopterygii\_odb9 database. YHS: Yap hadal snailfish, MHS: Mariana hadal snailfish.
