# Supplementary material for: Whole genome sequencing of a snailfish from the Yap Trench (~7,000 m) clarifies the molecular mechanisms underlying adaptation to the deep sea
Source: PubMed Central journal article supplement (PMC8118300; doi:10.1371/journal.pgen.1009530), 2021-05-13
Supplement: pgen.1009530.s005.pdf [file pgen.1009530.s005.pdf]

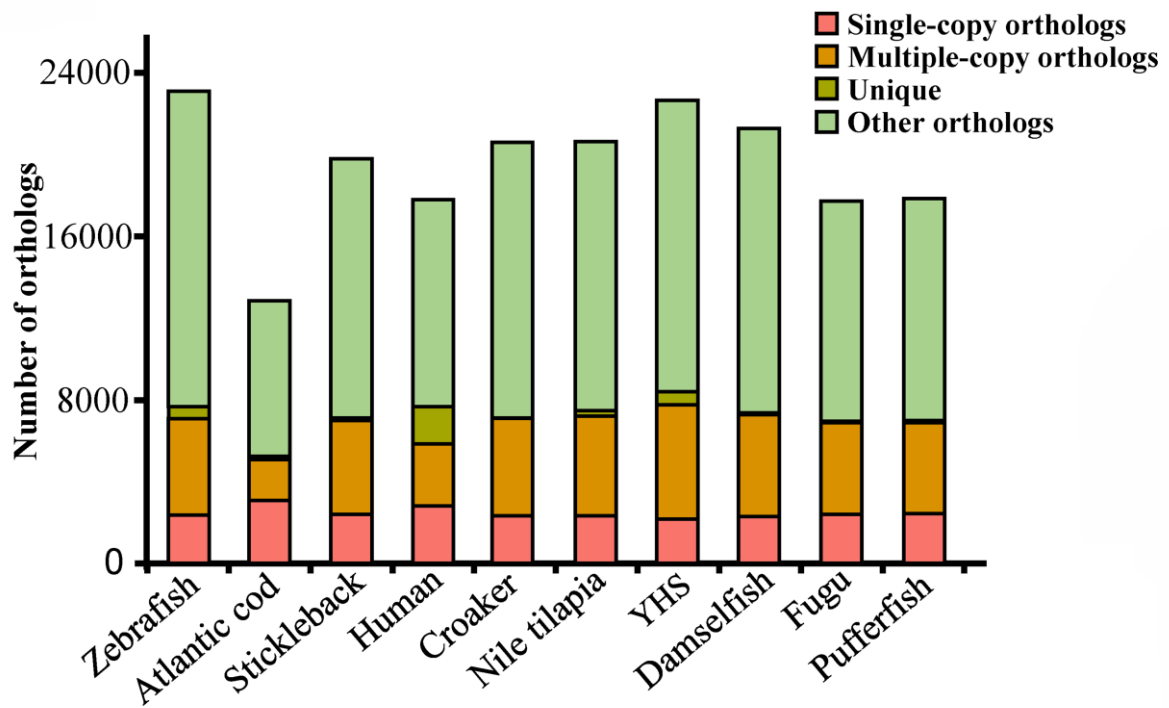

**S5 Fig. Gene family characteristics in the genomes of Yap hadal snailfish (YHS) and other representative vertebrates.** Gene family clusters were determined by OrthoMCL v 1.1. For each species, the longest transcript for each gene was retained, whereas the genes encoding a protein consisting of less than 30 amino acids were removed.
