# Supplementary material for: Whole genome sequencing of a snailfish from the Yap Trench (~7,000 m) clarifies the molecular mechanisms underlying adaptation to the deep sea
Source: PubMed Central journal article supplement (PMC8118300; doi:10.1371/journal.pgen.1009530), 2021-05-13
Supplement: pgen.1009530.s006.pdf [file pgen.1009530.s006.pdf]

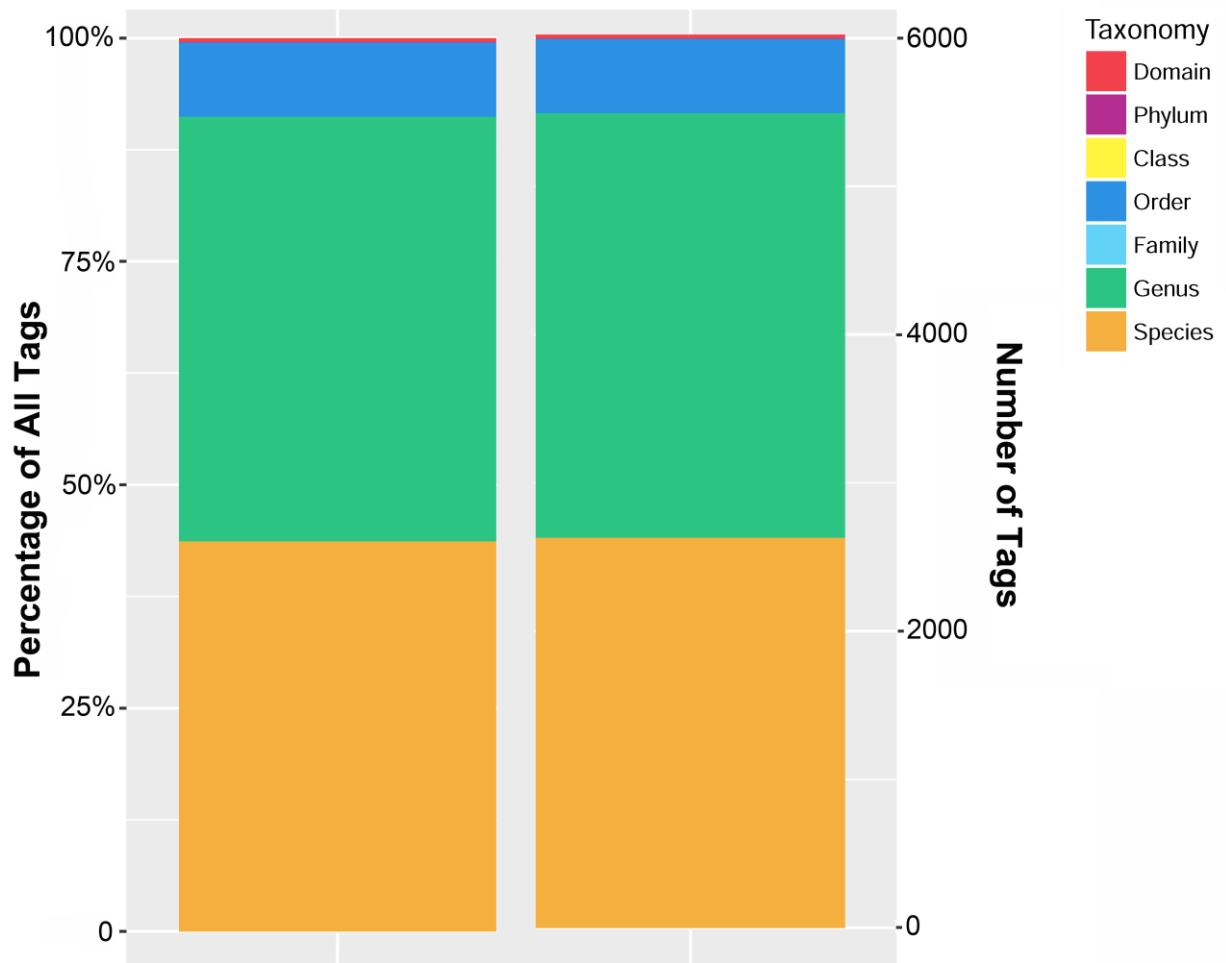

**S6 Fig. Tag distribution in the Yap hadal snailfish gut at different levels of classification.**
