# Supplementary material for: Whole genome sequencing of a snailfish from the Yap Trench (~7,000 m) clarifies the molecular mechanisms underlying adaptation to the deep sea
Source: PubMed Central journal article supplement (PMC8118300; doi:10.1371/journal.pgen.1009530), 2021-05-13
Supplement: pgen.1009530.s009.pdf [file pgen.1009530.s009.pdf]

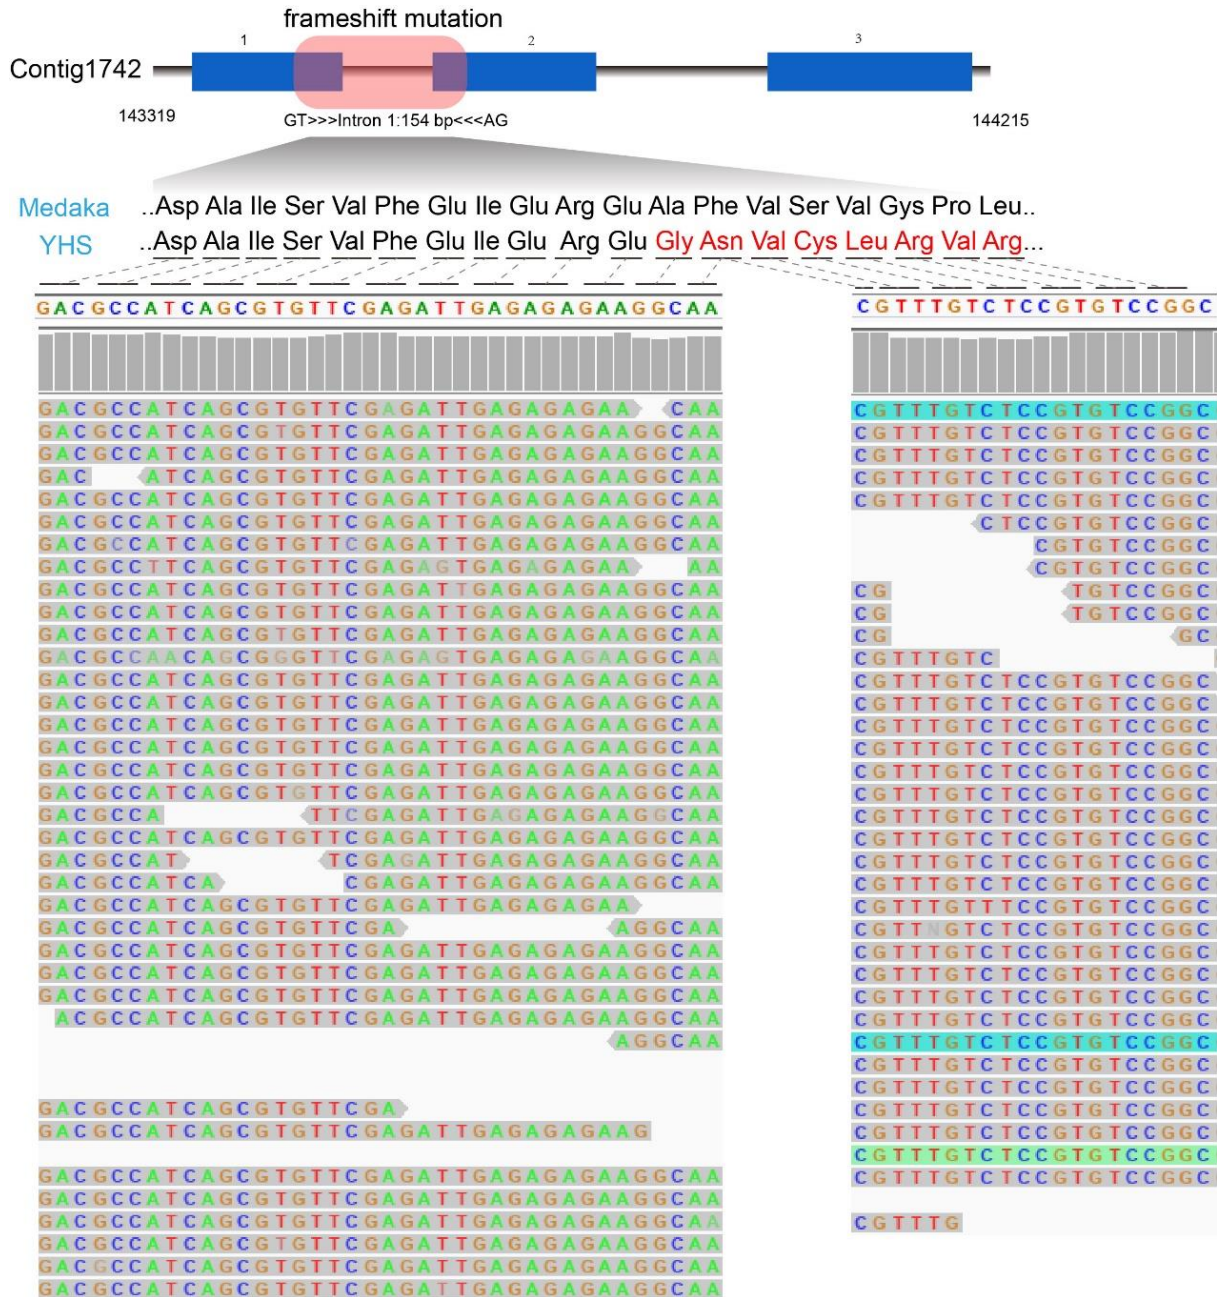

**S9 Fig.** Frameshift mutation in the ANNAT gene of Yap hadal snailfish (YHS). A frameshift mutation was identified in the YHS genome that led to a severe mutation in the open reading frame (ORF) of the ANNAT gene. The translated protein according to the mutated ORF is completely distinct from that of Medaka ANNAT.
