# Supplementary material for: Whole genome sequencing of a snailfish from the Yap Trench (~7,000 m) clarifies the molecular mechanisms underlying adaptation to the deep sea
Source: PubMed Central journal article supplement (PMC8118300; doi:10.1371/journal.pgen.1009530), 2021-05-13
Supplement: pgen.1009530.s010.pdf [file pgen.1009530.s010.pdf]

**S1 Table. Summary of sequencing data for Yap hadal snailfish (YHS).**

| <b>Platform</b>        | <b>Illumina Hiseq X Ten</b>             |             | <b>PacBio Sequel RSII</b>                                                                                    |           |
|------------------------|-----------------------------------------|-------------|--------------------------------------------------------------------------------------------------------------|-----------|
| Insert size (bp)       | 350 bp                                  |             | 9 kb                                                                                                         |           |
|                        | Raw data                                | Clean data  | Polymerase reads                                                                                             | Subreads  |
| Number of bases (Gb)   | 48.83                                   | 44.08       | 81.02                                                                                                        | 80.87     |
| Number of reads        | 162,779,110                             | 146,943,996 | 6,709,838                                                                                                    | 9,991,427 |
| Mean reads length (bp) | 150                                     | 150         | 12,075                                                                                                       | 8,093     |
| Reads N50 (kp)         | -                                       | -           | 20.58                                                                                                        | 12,688    |
| Sequence coverage (×)  | 59.87                                   | 54.05       | 99.34                                                                                                        | 99.15     |
| SRA accession          | PRJNA512070<br>(SRR8510169~ SRR8510172) |             | PRJNA512070<br>(SRR8510163~ SRR8510168;<br>SRR8929648~ SRR8929652;<br>SRR8929654; SRR8929657~<br>SRR8929660) |           |
