# Supplementary material for: Whole genome sequencing of a snailfish from the Yap Trench (~7,000 m) clarifies the molecular mechanisms underlying adaptation to the deep sea
Source: PubMed Central journal article supplement (PMC8118300; doi:10.1371/journal.pgen.1009530), 2021-05-13
Supplement: pgen.1009530.s011.pdf [file pgen.1009530.s011.pdf]

**S2 Table. Estimation of the Yap hadal snailfish genome size (Kmer = 17).**

| <b>K-mer</b> | <b>K-mer number</b> | <b>K-mer Depth</b> | <b>Genome Size (Mb)</b> | <b>Heterozygous Ratio (%)</b> |
|--------------|---------------------|--------------------|-------------------------|-------------------------------|
| 17           | 39,380,990,928      | 47                 | 815.59                  | 0.61                          |
