# Supplementary material for: Whole genome sequencing of a snailfish from the Yap Trench (~7,000 m) clarifies the molecular mechanisms underlying adaptation to the deep sea
Source: PubMed Central journal article supplement (PMC8118300; doi:10.1371/journal.pgen.1009530), 2021-05-13
Supplement: pgen.1009530.s012.pdf [file pgen.1009530.s012.pdf]

**S3 Table. Summary of the genome assembly of Yap hadal snailfish.**

| <b>Sample ID</b>   | <b>Length</b>      |                      | <b>Number</b> |                 |
|--------------------|--------------------|----------------------|---------------|-----------------|
|                    | <b>Contig (bp)</b> | <b>Scaffold (bp)</b> | <b>Contig</b> | <b>Scaffold</b> |
| Total              | 728,608,360        | 731,750,508          | 3,803         | 1,271           |
| Max                | 8,287,565          | 8,357,545            | -             | -               |
| Number $\geq$ 2000 | -                  | -                    | 3,764         | 1,248           |
| N50                | 753,890            | 1,256,700            | 213           | 159             |
| N60                | 451,277            | 889,758              | 337           | 229             |
| N70                | 247,462            | 646,228              | 556           | 326             |
| N80                | 143,792            | 431,389              | 943           | 467             |
| N90                | 73,673             | 259,655              | 1,650         | 686             |
