# Supplementary material for: Whole genome sequencing of a snailfish from the Yap Trench (~7,000 m) clarifies the molecular mechanisms underlying adaptation to the deep sea
Source: PubMed Central journal article supplement (PMC8118300; doi:10.1371/journal.pgen.1009530), 2021-05-13
Supplement: pgen.1009530.s013.pdf [file pgen.1009530.s013.pdf]

**S4 Table. Statistics of the genome reads coverage.**

---

|               |                          |         |
|---------------|--------------------------|---------|
| <b>Reads</b>  | Mapping rate             | 95.7%   |
|               | Average sequencing depth | 59.74 × |
|               | Coverage                 | 96.17%  |
| <b>Genome</b> | Coverage at least 4×     | 95.08%  |
|               | Coverage at least 10×    | 93.82%  |
|               | Coverage at least 20×    | 90.76%  |

---
