# Supplementary material for: Whole genome sequencing of a snailfish from the Yap Trench (~7,000 m) clarifies the molecular mechanisms underlying adaptation to the deep sea
Source: PubMed Central journal article supplement (PMC8118300; doi:10.1371/journal.pgen.1009530), 2021-05-13
Supplement: pgen.1009530.s014.pdf [file pgen.1009530.s014.pdf]

**S5 Table. CEGMA evaluation of the genome assembly.**

| <b>Species</b>             | <b>Complete</b> |                         | <b>Complete + Partial</b> |                         |
|----------------------------|-----------------|-------------------------|---------------------------|-------------------------|
|                            | <b>Prots</b>    | <b>Completeness (%)</b> | <b>Prots</b>              | <b>Completeness (%)</b> |
| <b>Yap hadal snailfish</b> | 222             | 89.52                   | 228                       | 91.94                   |
