# Supplementary material for: Whole genome sequencing of a snailfish from the Yap Trench (~7,000 m) clarifies the molecular mechanisms underlying adaptation to the deep sea
Source: PubMed Central journal article supplement (PMC8118300; doi:10.1371/journal.pgen.1009530), 2021-05-13
Supplement: pgen.1009530.s016.pdf [file pgen.1009530.s016.pdf]

**S7 Table. Statistics of the genome base content.**

---

| <b>Base</b> | <b>Number</b> | <b>Percentage (%)</b> |
|-------------|---------------|-----------------------|
| A           | 204,202,736   | 27.91                 |
| T           | 204,436,986   | 27.94                 |
| C           | 159,979,576   | 21.86                 |
| G           | 159,989,266   | 21.86                 |
| N           | 3,142,148     | 0.43                  |
| Total       | 731,750,712   | -                     |
| GC          | 319,968,842   | 43.92                 |

---
