# Supplementary material for: Whole genome sequencing of a snailfish from the Yap Trench (~7,000 m) clarifies the molecular mechanisms underlying adaptation to the deep sea
Source: PubMed Central journal article supplement (PMC8118300; doi:10.1371/journal.pgen.1009530), 2021-05-13
Supplement: pgen.1009530.s017.pdf [file pgen.1009530.s017.pdf]

**S8 Table. SNP results of the Yap hadal snailfish genome.**

| <b>Categories</b> | <b>Number</b> | <b>Percentage (%)</b> |
|-------------------|---------------|-----------------------|
| All SNP           | 1,392,120     | 0.2100                |
| Heterozygosis SNP | 1,377,731     | 0.2078                |
| Homology SNP      | 14,389        | 0.0022                |
