# Supplementary material for: Whole genome sequencing of a snailfish from the Yap Trench (~7,000 m) clarifies the molecular mechanisms underlying adaptation to the deep sea
Source: PubMed Central journal article supplement (PMC8118300; doi:10.1371/journal.pgen.1009530), 2021-05-13
Supplement: pgen.1009530.s018.pdf [file pgen.1009530.s018.pdf]

**S9 Table. Summary of repeats in the Yap hadal snailfish genome.**

---

| <b>Type</b>  | <b>Repeat Size (bp)</b> | <b>Percentage (%)</b> |
|--------------|-------------------------|-----------------------|
| TRF          | 117,024,159             | 15.99                 |
| RepeatMasker | 349,596,427             | 47.78                 |
| ProteinMask  | 69,005,392              | 9.43                  |
| Total        | 392,262,661             | 53.61                 |

---
