# Supplementary material for: Whole genome sequencing of a snailfish from the Yap Trench (~7,000 m) clarifies the molecular mechanisms underlying adaptation to the deep sea
Source: PubMed Central journal article supplement (PMC8118300; doi:10.1371/journal.pgen.1009530), 2021-05-13
Supplement: pgen.1009530.s019.pdf [file pgen.1009530.s019.pdf]

**S10 Table. Transposable elements in the Yap hadal snailfish genome.**

| Type             | RepeatMasker<br>(rebase + <i>de novo</i> ) |                | TE proteins    |                  | Combined TEs   |                |
|------------------|--------------------------------------------|----------------|----------------|------------------|----------------|----------------|
|                  | Length<br>(bp)                             | % in<br>genome | Length<br>(bp) | In genome<br>(%) | Length<br>(bp) | % in<br>genome |
| DNA              | 95,523,096                                 | 13.06          | 7,104,819      | 0.97             | 99,044,095     | 13.54          |
| LINE             | 162,614,128                                | 22.22          | 47,065,842     | 6.43             | 175,457,523    | 23.98          |
| SINE             | 2,920,405                                  | 0.40           | 0              | 0                | 2,920,405      | 0.40           |
| LTR              | 93,784,468                                 | 12.84          | 14,978,264     | 2.05             | 95,320,079     | 13.03          |
| Simple<br>repeat | 11,884,942                                 | 1.63           | 0              | 0                | 11,884,942     | 1.63           |
| Unknown          | 8,204,034                                  | 1.12           | 0              | 0                | 8,204,034      | 1.12           |
| Total            | 349,596,427                                | 47.78          | 69,005,392     | 9.43             | 354,679,850    | 48.47          |
