# Supplementary material for: Whole genome sequencing of a snailfish from the Yap Trench (~7,000 m) clarifies the molecular mechanisms underlying adaptation to the deep sea
Source: PubMed Central journal article supplement (PMC8118300; doi:10.1371/journal.pgen.1009530), 2021-05-13
Supplement: pgen.1009530.s020.pdf [file pgen.1009530.s020.pdf]

**S11 Table. Statistics of the noncoding RNA in the Yap hadal snailfish genome.**

| Type  | Number   | Average length (bp) | Total length (bp) | % of genome |
|-------|----------|---------------------|-------------------|-------------|
| miRNA | 1,651    | 107.67              | 177,759           | 0.022429    |
| tRNA  | 9,143    | 82.48               | 754,147           | 0.10306     |
| rRNA  | 3,572    | 118.95              | 424,874           | 0.058083    |
|       | 18S      | 2,707               | 253,565           | 0.034652    |
|       | 28S      | 340                 | 118,145           | 0.016146    |
|       | 5.8S     | 42                  | 6,309             | 0.000862    |
|       | 5S       | 483                 | 46,855            | 0.006403    |
| snRNA | 1,323    | 136.87              | 181,085           | 0.024747    |
|       | CD-box   | 262                 | 27,718            | 0.003788    |
|       | HACA-box | 152                 | 23,938            | 0.003271    |
|       | splicing | 869                 | 123,127           | 0.016826    |
| Total | -        | -                   | 2,137,522         | 0.292111    |
