# Supplementary material for: Whole genome sequencing of a snailfish from the Yap Trench (~7,000 m) clarifies the molecular mechanisms underlying adaptation to the deep sea
Source: PubMed Central journal article supplement (PMC8118300; doi:10.1371/journal.pgen.1009530), 2021-05-13
Supplement: pgen.1009530.s021.pdf [file pgen.1009530.s021.pdf]

**S12 Table. Prediction of the gene structure in the Yap hadal snailfish genome.**

|                    | Gene set   | Number  | Average transcript length (bp) | Average CDS length (bp) | Average exons per gene | Average intron length (bp) |
|--------------------|------------|---------|--------------------------------|-------------------------|------------------------|----------------------------|
| <i>De novo</i>     | Augustus   | 36,404  | 7,416.78                       | 1,182.51                | 6.50                   | 1,132.99                   |
|                    | GlimmerHMM | 121,413 | 6,046.06                       | 618.52                  | 3.66                   | 2,039.36                   |
|                    | SNAP       | 70,320  | 8,325.18                       | 806.70                  | 4.98                   | 1,888.45                   |
|                    | Geneid     | 61,556  | 7,947.94                       | 933.00                  | 4.41                   | 2,058.36                   |
|                    | Genscan    | 40,464  | 14,225.07                      | 1,452.56                | 7.80                   | 1,878.54                   |
| <b>Homolog</b>     | <i>Dre</i> | 28,362  | 7,570.47                       | 1,402.73                | 6.64                   | 1,094.15                   |
|                    | <i>Gac</i> | 41,014  | 5,621.77                       | 1,017.79                | 5.28                   | 1,076.64                   |
|                    | <i>Hsa</i> | 21,915  | 8,614.11                       | 1,381.58                | 7.16                   | 1,173.46                   |
|                    | <i>Lcr</i> | 33,542  | 7,487.63                       | 1,354.76                | 6.50                   | 1,116.06                   |
|                    | <i>Mmu</i> | 22,232  | 8,488.07                       | 1,360.13                | 7.08                   | 1,172.85                   |
|                    | <i>Oni</i> | 38,860  | 6,180.03                       | 1,223.68                | 5.59                   | 1,079.56                   |
|                    | <i>Tni</i> | 25,602  | 8,143.45                       | 1,339.64                | 7.22                   | 1,093.05                   |
|                    | <i>Tru</i> | 32,858  | 6,659.68                       | 1,264.91                | 5.98                   | 1,083.81                   |
| <b>RNAseq</b>      | PASA       | 96,601  | 6,658.02                       | 1,045.17                | 6.70                   | 984.93                     |
|                    | Cufflinks  | 57,534  | 12,016.39                      | 2,920.45                | 8.37                   | 1,233.84                   |
| <b>EVM</b>         |            | 30,938  | 9,449.83                       | 1,300.12                | 7.59                   | 1,237.26                   |
| <b>Pasa-update</b> |            | 30,282  | 9,858.55                       | 1,348.63                | 7.82                   | 1,247.13                   |
| <b>Final set</b>   |            | 24,329  | 10,675.78                      | 1,420.88                | 8.41                   | 1,249.54                   |

Abbreviation: *Danio rerio* (*Dre*), *Gasterosteus aculeatus* (*Gac*), *Homo sapiens* (*Hsa*), *Ictalurus punctatus* (*Ipu*), *Lepisosteus oculatus* (*Loc*), *Oreochromis niloticus* (*Oni*), *Takifugu rubripes* (*Tru*), *Tetraodon nigroviridis* (*Tni*), *Larimichthys crocea* (*Lcr*), *Mus musculus* (*Mmu*).
