# Supplementary material for: Whole genome sequencing of a snailfish from the Yap Trench (~7,000 m) clarifies the molecular mechanisms underlying adaptation to the deep sea
Source: PubMed Central journal article supplement (PMC8118300; doi:10.1371/journal.pgen.1009530), 2021-05-13
Supplement: pgen.1009530.s022.pdf [file pgen.1009530.s022.pdf]

**S13 Table. Information for the RNA-seq data from different Yap hadal snailfish tissues.**

| <b>ID</b> | <b>Tissues</b> | <b>Raw Reads</b> | <b>Clean reads</b> | <b>Clean bases (Gb)</b> | <b>Error (%)</b> | <b>Q20 (%)</b> | <b>Q30 (%)</b> | <b>GC (%)</b> |
|-----------|----------------|------------------|--------------------|-------------------------|------------------|----------------|----------------|---------------|
| A         | Liver_1        | 24,469,958       | 24,089,587         | 3.6                     | 0.04             | 96.0           | 91.1           | 48.8          |
| B         | Liver_2        | 24,469,958       | 24,089,587         | 3.6                     | 0.05             | 94.8           | 88.5           | 49.0          |
| C         | Intestines_1   | 27,623,319       | 27,243,693         | 4.1                     | 0.04             | 96.4           | 91.6           | 51.4          |
| D         | Intestines_2   | 27,623,319       | 27,243,693         | 4.1                     | 0.05             | 95.8           | 90.3           | 51.5          |
| E         | Eye_1          | 23,601,154       | 23,284,416         | 3.5                     | 0.04             | 96.4           | 91.5           | 50.6          |
| F         | Eye_2          | 23,601,154       | 23,284,416         | 3.5                     | 0.05             | 95.7           | 90.0           | 50.7          |
| G         | Skin_1         | 21,010,608       | 20,692,043         | 3.1                     | 0.04             | 96.7           | 92.0           | 51.8          |
| H         | Skin_2         | 21,010,608       | 20,692,043         | 3.1                     | 0.04             | 96.1           | 90.6           | 51.8          |
| I         | Stomach_1      | 26,402,614       | 25,951,878         | 3.9                     | 0.04             | 96.3           | 91.4           | 50.9          |
| J         | Staomach_2     | 26,402,614       | 25,951,878         | 3.9                     | 0.05             | 95.4           | 89.6           | 51.0          |
| K         | Muscle_1       | 24,889,824       | 24,608,914         | 3.7                     | 0.04             | 96.7           | 92.2           | 52.4          |
| L         | Muscle_2       | 24,889,824       | 24,608,914         | 3.7                     | 0.04             | 96.1           | 90.7           | 52.5          |
