# Supplementary material for: Whole genome sequencing of a snailfish from the Yap Trench (~7,000 m) clarifies the molecular mechanisms underlying adaptation to the deep sea
Source: PubMed Central journal article supplement (PMC8118300; doi:10.1371/journal.pgen.1009530), 2021-05-13
Supplement: pgen.1009530.s023.pdf [file pgen.1009530.s023.pdf]

**S14 Table. Gene structures of Yap hadal snailfish and other teleost genomes.**

| <b>Species</b>          | <b>Number</b> | <b>Average transcript length (bp)</b> | <b>Average CDS length (bp)</b> | <b>Average exons Per gene</b> | <b>Average exon length (bp)</b> | <b>Average intron length (bp)</b> |
|-------------------------|---------------|---------------------------------------|--------------------------------|-------------------------------|---------------------------------|-----------------------------------|
| Yap hadal snailfish     | 24,329        | 10,675.78                             | 1,420.88                       | 8.41                          | 169.02                          | 1,249.54                          |
| Mariana hadal snailfish | 25,262        | 10,976.09                             | 1,493.65                       | 9.00                          | 165.94                          | 1,185.17                          |
| Tanaka's snailfish      | 23,776        | 8,930.18                              | 1,544.21                       | 8.89                          | 173.62                          | 935.64                            |
| Zebrafish               | 25,619        | 25,207.59                             | 1,642.64                       | 9.42                          | 174.39                          | 2,798.97                          |
| Stickleback             | 20,787        | 8,451.06                              | 1,548.67                       | 10.40                         | 148.94                          | 734.44                            |
| Croaker                 | 22,274        | 13,224.04                             | 1,740.60                       | 10.48                         | 166.04                          | 1,210.97                          |
| Nile tilapia            | 21,437        | 14,903.11                             | 1,714.22                       | 10.90                         | 157.25                          | 1,332.07                          |
| Pufferfish              | 19,602        | 6,066.17                              | 1,516.59                       | 10.52                         | 144.20                          | 478.02                            |
| Fugu                    | 18,523        | 7,492.75                              | 1,693.53                       | 11.10                         | 152.61                          | 574.33                            |
