# Supplementary material for: Whole genome sequencing of a snailfish from the Yap Trench (~7,000 m) clarifies the molecular mechanisms underlying adaptation to the deep sea
Source: PubMed Central journal article supplement (PMC8118300; doi:10.1371/journal.pgen.1009530), 2021-05-13
Supplement: pgen.1009530.s024.pdf [file pgen.1009530.s024.pdf]

**S15 Table. Functional annotation of the genes in the Yap hadal snailfish genome.**

---

| <b>Parameter</b> | <b>Number</b> | <b>Percentage (%)</b> |
|------------------|---------------|-----------------------|
| Total            | 24,329        | -                     |
| Swissprot        | 22,208        | 91.28                 |
| Nr               | 23,626        | 97.11                 |
| KEGG             | 20,200        | 83.03                 |
| InterPro         | 24,196        | 99.45                 |
| GO               | 22,460        | 92.32                 |
| PFAM             | 19,164        | 78.77                 |
| Annotated        | 24,265        | 99.74                 |
| Unannotated      | 64            | 0.26                  |

---
