# Supplementary material for: Whole genome sequencing of a snailfish from the Yap Trench (~7,000 m) clarifies the molecular mechanisms underlying adaptation to the deep sea
Source: PubMed Central journal article supplement (PMC8118300; doi:10.1371/journal.pgen.1009530), 2021-05-13
Supplement: pgen.1009530.s025.pdf [file pgen.1009530.s025.pdf]

**S16 Table. Accession numbers for the genome assemblies used in this study.**

| <b>Species</b>                  | <b>Common name</b>      | <b>Accession number</b> |
|---------------------------------|-------------------------|-------------------------|
| <i>Liparis tanakae</i>          | Tanaka's snailfish      | GCA_006348945.1         |
| <i>Astyanax mexicanus</i>       | Mexican tetra           | GCA_000372685.2         |
| <i>Cyprinus carpio</i>          | Common carp             | GCA_000951615.2         |
| <i>Danio rerio</i>              | zebrafish               | GCA_000002035.4         |
| <i>Electrophorus electricus</i> | Electric Eel            | GCA_013358815.1         |
| <i>Gadus morhua</i>             | Atlantic cod            | GCA_902167405.1         |
| <i>Gasterosteus aculeatus</i>   | Stickleback             | GCA_006229165.1         |
| <i>Homo sapiens</i>             | Human                   | GCA_000001405.28        |
| <i>Ictalurus punctatus</i>      | Channel catfish         | GCA_001660625.1         |
| <i>Lepisosteus oculatus</i>     | Spotted gar             | GCA_000242695.1         |
| <i>Nothobranchius furzeri</i>   | Turquoise killifish     | GCA_001465895.2         |
| <i>Oreochromis niloticus</i>    | Nile tilapia            | GCA_001858045.3         |
| <i>Oryzias melastigma</i>       | Marine medaka           | GCA_002922805.2         |
| <i>Salmo salar</i>              | Atlantic Salmon         | GCA_000233375.4         |
| <i>Takifugu rubripes</i>        | Fugu                    | GCA_901000725.2         |
| <i>Tetraodon nigroviridis</i>   | Spotted pufferfish      | GCA_000180735.1         |
| <i>Xiphophorus maculatus</i>    | Platyfish               | GCA_002775205.2         |
| <i>Larimichthys crocea</i>      | Large yellow croaker    | GCA_000972845.2         |
| <i>Stegastes partitus</i>       | Bicolor damselfish      | GCA_000690725.1         |
| <i>Pseudoliparis swirei</i>     | Mariana hadal snailfish | PRJNA472845             |
