# Supplementary material for: Whole genome sequencing of a snailfish from the Yap Trench (~7,000 m) clarifies the molecular mechanisms underlying adaptation to the deep sea
Source: PubMed Central journal article supplement (PMC8118300; doi:10.1371/journal.pgen.1009530), 2021-05-13
Supplement: pgen.1009530.s026.pdf [file pgen.1009530.s026.pdf]

**S17 Table. Partial GO enrichment (Level 4) of positively selected genes from the genome assembly of Yap hadal snailfish.**

| <b>GO ID</b> | <b>GO Term</b>                                                        | <b>GO Class</b> | <b><i>P</i>-value</b> | <b>Adjusted <i>P</i>-value</b> | <b>Gene number</b> |
|--------------|-----------------------------------------------------------------------|-----------------|-----------------------|--------------------------------|--------------------|
| GO:0016741   | transferase activity, transferring one-carbon groups                  | MF              | 0.0001376             | 0.2409646                      | 25                 |
| GO:0044428   | nuclear part                                                          | CC              | 0.002388              | 0.4312696                      | 29                 |
| GO:0003676   | nucleic acid binding                                                  | MF              | 0.00267               | 0.4312696                      | 304                |
| GO:0006281   | DNA repair                                                            | BP              | 0.0031379             | 0.4312696                      | 34                 |
| GO:0016810   | hydrolase activity, acting on carbon-nitrogen (but not peptide) bonds | MF              | 0.003553              | 0.4312696                      | 14                 |
| GO:0043244   | regulation of protein complex disassembly                             | BP              | 0.0049101             | 0.4344086                      | 3                  |
| GO:0070013   | intracellular organelle lumen                                         | CC              | 0.0055698             | 0.4344086                      | 27                 |
| GO:0044391   | ribosomal subunit                                                     | CC              | 0.0072305             | 0.4661267                      | 6                  |
| GO:0008023   | transcription elongation factor complex                               | CC              | 0.012441              | 0.4964212                      | 3                  |
| GO:0008406   | gonad development                                                     | BP              | 0.012447              | 0.4964212                      | 2                  |
| GO:0034641   | cellular nitrogen compound metabolic process                          | BP              | 0.0231437             | 0.4964212                      | 356                |
| GO:0008219   | cell death                                                            | BP              | 0.0233498             | 0.4964212                      | 21                 |
| GO:0008073   | ornithine decarboxylase inhibitor activity                            | MF              | 0.0238081             | 0.4964212                      | 2                  |
| GO:1901360   | organic cyclic compound metabolic process                             | BP              | 0.0309903             | 0.4964212                      | 352                |
| GO:0009888   | tissue development                                                    | BP              | 0.031599              | 0.4964212                      | 3                  |
| GO:0006725   | cellular aromatic compound metabolic process                          | BP              | 0.0325971             | 0.4964212                      | 348                |
| GO:0046483   | heterocycle metabolic process                                         | BP              | 0.032734              | 0.4964212                      | 349                |
| GO:0016645   | oxidoreductase activity, acting on the CH-NH group of donors          | MF              | 0.039052              | 0.4964212                      | 5                  |
| GO:0016627   | oxidoreductase activity, acting on the CH-CH group of donors          | MF              | 0.0444156             | 0.4964212                      | 7                  |
