# Supplementary material for: Whole genome sequencing of a snailfish from the Yap Trench (~7,000 m) clarifies the molecular mechanisms underlying adaptation to the deep sea
Source: PubMed Central journal article supplement (PMC8118300; doi:10.1371/journal.pgen.1009530), 2021-05-13
Supplement: pgen.1009530.s027.pdf [file pgen.1009530.s027.pdf]

**S18 Table. The positively selected genes involved in the DNA repair from Yap hadal snailfish.**

|    | <b>Gene ID</b>        | <b>Name</b>    | <b>Description</b>                                            |
|----|-----------------------|----------------|---------------------------------------------------------------|
| 1  | Contig538_pilon.10    | <i>ssna1</i>   | Sjogren syndrome nuclear autoantigen 1                        |
| 2  | Contig31_pilon.44.1   | <i>blm</i>     | bloom syndrome protein                                        |
| 3  | Contig31_pilon.277    | <i>tobi</i>    | target of brain insulin                                       |
| 4  | Contig31_pilon.176    | <i>rad52</i>   | DNA repair protein RAD52 homolog                              |
| 5  | Contig150_pilon.2     | <i>tymp</i>    | thymidine phosphorylase                                       |
| 6  | Contig859_pilon.172   | <i>nphs1</i>   | Nephrin                                                       |
| 7  | Contig210_pilon.12    | <i>hes7</i>    | hairy and enhancer of split 7                                 |
| 8  | Contig1453_pilon.52   | <i>ino80e</i>  | INO80 complex subunit E                                       |
| 9  | Contig17_pilon.57     | <i>rtn3</i>    | Reticulon-3                                                   |
| 10 | Contig173_pilon.124.1 | <i>ttl11</i>   | tubulin tyrosine ligase-like family member 11                 |
| 11 | Contig2614_pilon.17.1 | <i>rad9a</i>   | cell cycle checkpoint control protein RAD9A                   |
| 12 | Contig1218_pilon.3    | <i>orc4</i>    | origin recognition complex subunit 4                          |
| 13 | Contig405_pilon.32    | <i>nhej1</i>   | non-homologous end-joining factor 1                           |
| 14 | Contig1236_pilon.75   | <i>ercc1</i>   | DNA excision repair protein ERCC-1                            |
| 15 | Contig2450_pilon.51   | <i>gramd1c</i> | -GRAM domain-containing protein 1C                            |
| 16 | Contig1232_pilon.3    | <i>mbd4</i>    | methyl-CpG-binding domain protein 4                           |
| 17 | Contig79_pilon.12     | <i>pms1</i>    | DNA mismatch repair protein PMS1                              |
| 18 | Contig132_pilon.13    | <i>rexo1</i>   | RNA exonuclease 1 homolog                                     |
| 19 | Contig77_pilon.52     | <i>taspl</i>   | Threonine aspartase 1                                         |
| 20 | Contig77_pilon.31.17  | <i>nsmce4a</i> | Non-structural maintenance of chromosomes element 4 homolog A |
| 21 | Contig1371_pilon.1    | <i>fancl</i>   | E3 ubiquitin-protein ligase FANCL                             |
| 22 | Contig446_pilon.62    | <i>gtf2h3</i>  | General transcription factor IIH subunit 3                    |
| 23 | Contig423_pilon.55    | <i>exo1</i>    | exonuclease 1                                                 |
| 24 | Contig1717_pilon.109  | <i>phr</i>     | deoxyribodipyrimidine photo-lyase                             |
| 25 | Contig984_pilon.15    | <i>sprtn</i>   | SprT-like domain-containing protein Spartan                   |
| 26 | Contig1085_pilon.20.1 | <i>dmap1</i>   | DNA methyltransferase 1-associated protein 1                  |
| 27 | Contig622_pilon.196   | <i>aste1</i>   | Protein asteroid homolog 1                                    |
| 28 | Contig622_pilon.209   | <i>twistnb</i> | DNA-directed RNA polymerase I subunit RPA43                   |
| 29 | Contig1049_pilon.1    | <i>ascl1a</i>  | achaete-scute complex protein                                 |
| 30 | Contig517_pilon.60    | <i>mgmt</i>    | Methylated DNA protein cysteine methyltransferase             |
| 31 | Contig80_pilon.23     | <i>polk</i>    | DNA polymerase kappa                                          |
| 32 | Contig966_pilon.20    | <i>fam73a</i>  | Protein FAM73A                                                |
| 33 | Contig2719_pilon.14   | <i>cpb2</i>    | carboxypeptidase B2                                           |
| 34 | Contig1619_pilon.27   | <i>nom1</i>    | nucleolar MIF4G domain-containing protein 1                   |
