# Supplementary material for: Whole genome sequencing of a snailfish from the Yap Trench (~7,000 m) clarifies the molecular mechanisms underlying adaptation to the deep sea
Source: PubMed Central journal article supplement (PMC8118300; doi:10.1371/journal.pgen.1009530), 2021-05-13
Supplement: pgen.1009530.s028.pdf [file pgen.1009530.s028.pdf]

**S19 Table. List of Pfam domains with more copies in Yap hadal snailfish than in other species.**

| <b>Domain name</b> | <b>Yap hadal snailfish</b> | <b>Mariana hadal snailfish</b> | <b>Tanaka's snailfish</b> | <b>Zebrafish</b> |
|--------------------|----------------------------|--------------------------------|---------------------------|------------------|
| Ion_trans          | 182                        | 172                            | 164                       | 154              |
| Pro_isomerase      | 27                         | 22                             | 19                        | 19               |
| Dynein_heavy       | 20                         | 12                             | 15                        | 13               |
| ASC                | 18                         | 10                             | 10                        | 7                |
| Nebulin            | 11                         | 6                              | 7                         | 4                |
| Fam20C             | 10                         | 9                              | 4                         | 6                |
| Sarcoglycan_1      | 9                          | 7                              | 5                         | 4                |
| DUF3498            | 9                          | 3                              | 3                         | 3                |
| TMPIT              | 9                          | 2                              | 3                         | 3                |
| Beta-Casp          | 8                          | 6                              | 4                         | 4                |
| Peptidase_S10      | 8                          | 3                              | 4                         | 4                |
| Rad51              | 8                          | 4                              | 6                         | 7                |
| DUF4487            | 7                          | 10                             | 1                         | 1                |
| Nuc_rec_co-act     | 7                          | 5                              | 4                         | 3                |
| BPS                | 7                          | 4                              | 4                         | 3                |
| SRC-1              | 7                          | 4                              | 3                         | 3                |
| Orn_DAP_Arg_deC    | 7                          | 7                              | 4                         | 3                |
| zf-nanos           | 7                          | 3                              | 3                         | 3                |
| RNA_pol_Rpb4       | 7                          | 4                              | 1                         | 2                |
| FG-GAP_2           | 6                          | 5                              | 4                         | 2                |
| Ribosomal_L3       | 6                          | 5                              | 3                         | 2                |
| Rad21_Rec8         | 6                          | 5                              | 3                         | 3                |
| RMMBL              | 6                          | 5                              | 3                         | 3                |
| DUF3399            | 6                          | 3                              | 3                         | 3                |
| CRF                | 6                          | 3                              | 3                         | 3                |
| ALMS_motif         | 5                          | 4                              | 3                         | 1                |
| NUC194             | 5                          | 2                              | 1                         | 1                |
| EnY2               | 4                          | 4                              | 0                         | 1                |
| Keratin_B2_2       | 3                          | 0                              | 2                         | 0                |
| B_lectin           | 3                          | 1                              | 1                         | 0                |
| TMEM100            | 3                          | 2                              | 2                         | 0                |
