# Supplementary material for: Whole genome sequencing of a snailfish from the Yap Trench (~7,000 m) clarifies the molecular mechanisms underlying adaptation to the deep sea
Source: PubMed Central journal article supplement (PMC8118300; doi:10.1371/journal.pgen.1009530), 2021-05-13
Supplement: pgen.1009530.s029.pdf [file pgen.1009530.s029.pdf]

**S20 Table. Numbers of olfactory receptor (OR) genes in the examined fish species.**

| Species                 | Group          | $\alpha$ | $\beta$ | $\gamma$ | $\gamma$ | $\varepsilon$ | $\xi$ | $\eta$ | $\theta$ | $\kappa$ | T   |
|-------------------------|----------------|----------|---------|----------|----------|---------------|-------|--------|----------|----------|-----|
| Yap hadal snailfish     | F <sup>a</sup> | 0        | 0       | 0        | 14       | 1             | 7     | 2      | 1        | 0        | 25  |
|                         | T <sup>b</sup> | 0        | 1       | 0        | 24       | 1             | 7     | 5      | 1        | 1        | 40  |
| Mariana hadal snailfish | F              | 0        | 0       | 0        | 14       | 1             | 7     | 2      | 1        | 0        | 25  |
|                         | T              | 0        | 1       | 0        | 24       | 1             | 7     | 5      | 1        | 1        | 40  |
| Zebrafish               | F              | 0        | 1       | 1        | 44       | 11            | 27    | 22     | 1        | 1        | 108 |
|                         | T              | 0        | 1       | 1        | 53       | 14            | 41    | 24     | 1        | 1        | 136 |
| Pufferfish              | F              | 0        | 1       | 0        | 28       | 2             | 6     | 5      | 1        | 1        | 44  |
|                         | T              | 0        | 1       | 0        | 61       | 2             | 6     | 24     | 1        | 1        | 98  |
| Fugu                    | F              | 0        | 1       | 0        | 42       | 2             | 5     | 10     | 1        | 1        | 62  |
|                         | T              | 0        | 1       | 0        | 62       | 2             | 6     | 22     | 1        | 1        | 95  |
| Stickleback             | F              | 0        | 1       | 2        | 20       | 2             | 3     | 0      | 0        | 1        | 29  |
|                         | T              | 0        | 1       | 2        | 26       | 2             | 13    | 0      | 0        | 1        | 45  |
| Croaker                 | F              | 0        | 0       | 0        | 52       | 2             | 6     | 12     | 1        | 0        | 73  |
|                         | T              | 0        | 1       | 0        | 74       | 3             | 9     | 38     | 1        | 1        | 127 |
| Sia                     | F              | 0        | 1       | 1        | 26       | 4             | 5     | 11     | 2        | 2        | 52  |
|                         | T              | 0        | 1       | 2        | 61       | 10            | 42    | 21     | 2        | 2        | 141 |
| Sig                     | F              | 0        | 1       | 1        | 33       | 3             | 11    | 10     | 2        | 2        | 62  |
|                         | T              | 0        | 1       | 1        | 50       | 8             | 21    | 17     | 2        | 2        | 102 |
| Sir                     | F              | 0        | 1       | 2        | 27       | 9             | 7     | 11     | 2        | 1        | 60  |
|                         | T              | 0        | 1       | 2        | 61       | 12            | 53    | 27     | 2        | 2        | 160 |

<sup>a</sup> ‘F’ represents the number of functional OR genes. <sup>b</sup> ‘T’ represents total number of OR genes.

Sia: *Sinocyclocheilus anshuiensis*, Sig: *Sinocyclocheilus grahami*, Sir: *Sinocyclocheilus rhinoceros*.
