# Supplementary material for: Whole genome sequencing of a snailfish from the Yap Trench (~7,000 m) clarifies the molecular mechanisms underlying adaptation to the deep sea
Source: PubMed Central journal article supplement (PMC8118300; doi:10.1371/journal.pgen.1009530), 2021-05-13
Supplement: pgen.1009530.s030.pdf [file pgen.1009530.s030.pdf]

**S21 Table. The copy number of crystalline genes in Yap hadal snailfish and other fish species.**

| Gene name                  | Zebrafish | YHS | Fugu | stickleback | croaker | pufferfish | Sig | Sir | Sia |
|----------------------------|-----------|-----|------|-------------|---------|------------|-----|-----|-----|
| <i>cryaa</i>               | 1         | 0   | 1    | 1           | 1       | 2          | 3   | 2   | 5   |
| <i>cryaba</i>              | 1         | 1   | 1    | 1           | 1       | 1          | 1   | 2   | 2   |
| <i>cryabb</i>              | 2         | 1   | 0    | 2           | 3       | 1          | 2   | 2   | 2   |
| <i>cryba1a</i>             | 1         | 6   | 1    | 2           | 2       | 2          | 2   | 2   | 2   |
| <i>cryba1b</i>             | 1         | 0   | 1    | 0           | 0       | 0          | 2   | 2   | 2   |
| <i>cryba1l1</i>            | 1         | 1   | 1    | 2           | 3       | 2          | 2   | 2   | 1   |
| <i>cryba1l2</i>            | 1         | 0   | 0    | 0           | 0       | 0          | 4   | 3   | 3   |
| <i>cryba2a</i>             | 1         | 0   | 0    | 0           | 1       | 0          | 2   | 2   | 2   |
| <i>cryba2b</i>             | 1         | 0   | 1    | 1           | 0       | 1          | 3   | 2   | 2   |
| <i>cryba4</i>              | 1         | 1   | 1    | 0           | 1       | 1          | 2   | 1   | 2   |
| <i>crybb1</i>              | 1         | 1   | 1    | 0           | 1       | 1          | 2   | 2   | 2   |
| <i>crybb1l1</i>            | 1         | 1   | 2    | 2           | 3       | 2          | 2   | 2   | 2   |
| <i>crybb1l2</i>            | 1         | 0   | 0    | 0           | 0       | 0          | 2   | 3   | 2   |
| <i>crybb1l3</i>            | 1         | 6   | 1    | 1           | 1       | 1          | 1   | 1   | 1   |
| <i>crybb2</i>              | 1         | 0   | 1    | 1           | 1       | 1          | 2   | 2   | 2   |
| <i>crybb3</i>              | 1         | 1   | 2    | 2           | 3       | 2          | 2   | 2   | 2   |
| <i>crybgx</i>              | 1         | 1   | 1    | 1           | 1       | 1          | 3   | 3   | 5   |
| <i>crygm1</i>              | 0         | 0   | 0    | 0           | 0       | 2          | 2   | 3   | 2   |
| <i>crygm2</i>              | 15        | 6   | 2    | 9           | 11      | 11         | 17  | 10  | 9   |
| <i>crygm3</i>              | 1         | 0   | 5    | 1           | 2       | 5          | 2   | 2   | 1   |
| <i>crygm4</i>              | 1         | 0   | 0    | 0           | 0       | 0          | 0   | 0   | 0   |
| <i>crygm5</i>              | 0         | 0   | 0    | 1           | 0       | 0          | 1   | 1   | 1   |
| <i>crygm6</i>              | 1         | 0   | 1    | 0           | 1       | 1          | 2   | 1   | 1   |
| <i>crygm7</i>              | 1         | 0   | 0    | 1           | 1       | 0          | 1   | 1   | 0   |
| <i>crygm<sub>x</sub></i>   | 1         | 1   | 1    | 1           | 1       | 1          | 1   | 1   | 0   |
| <i>crygm<sub>x</sub>l1</i> | 1         | 0   | 1    | 1           | 1       | 1          | 1   | 1   | 1   |
| <i>crygm<sub>x</sub>l2</i> | 1         | 0   | 0    | 0           | 1       | 0          | 2   | 2   | 2   |
| <i>crygn1</i>              | 1         | 2   | 1    | 1           | 2       | 1          | 2   | 2   | 2   |
| <i>crygn2</i>              | 1         | 0   | 1    | 1           | 1       | 1          | 1   | 2   | 1   |
| <i>crygs1</i>              | 1         | 1   | 0    | 1           | 1       | 1          | 5   | 2   | 3   |
| <i>crygs2</i>              | 1         | 0   | 0    | 0           | 0       | 0          | 2   | 2   | 2   |
| <i>crygs3</i>              | 1         | 0   | 4    | 1           | 3       | 3          | 3   | 3   | 4   |
| <i>crygs4</i>              | 1         | 0   | 0    | 1           | 0       | 0          | 1   | 2   | 2   |
| <i>cryl1</i>               | 1         | 1   | 1    | 1           | 1       | 0          | 2   | 2   | 2   |
| <i>crym</i>                | 1         | 1   | 1    | 1           | 1       | 1          | 2   | 2   | 1   |
| <i>cryz</i>                | 1         | 2   | 0    | 1           | 1       | 1          | 1   | 1   | 1   |
| <i>cryz1l</i>              | 1         | 1   | 1    | 1           | 1       | 0          | 2   | 2   | 2   |
| total                      | 50        | 35  | 34   | 39          | 51      | 47         | 87  | 77  | 76  |

Sia: *Sinocyclocheilus anshuiensis*, Sig: *Sinocyclocheilus grahmi*, Sir: *Sinocyclocheilus rhinoceros*, YHS: Yap hadal snailfish.
