# Supplementary material for: Whole genome sequencing of a snailfish from the Yap Trench (~7,000 m) clarifies the molecular mechanisms underlying adaptation to the deep sea
Source: PLoS Genet. 2021 May 13;17(5):e1009530. doi: 10.1371/journal.pgen.1009530 (PMC8118300; doi:10.1371/journal.pgen.1009530)
Supplement: S6 Table — (PDF) [file pgen.1009530.s015.pdf]

**S6 Table. BUSCO evaluation of the genome assembly.**

| BUSCO categories            | Percentage |
|-----------------------------|------------|
| Complete                    | 90.3%      |
| Complete single-copy        | 83.3%      |
| Complete duplicate          | 7.0%       |
| Fragmented                  | 4.3%       |
| Missing BUSCOs              | 5.4%       |
| Total BUSCO groups searched | 2586       |
